# Supplementary material for: An ultra-lithiophilic oxidation layer in a Ni-foam-based anode for lithium metal batteries
Source: Royal Society of Chemistry journal article supplement (doi:10.1039/d1ma00065a), 2021-01-01
Supplement: d1ma00065a2.pdf [file d1ma00065a2.pdf]

## Supplementary information

### Ultra-lithiophilic oxidation layer in a Ni-foam-based anode for lithium metal batteries

Yusong Choi<sup>a,\*</sup>, Tae-Young Ahn<sup>a</sup>, Eun Hye Lee<sup>a</sup>, Tae-Uk Hur<sup>a</sup>, Sang-Hyeon Ha<sup>a,b</sup>, Jae-In Lee<sup>a,b</sup>,  
Tae Ryong Park<sup>a</sup>, Jang-Hyeon Cho<sup>a</sup>

<sup>a</sup>Agency for Defense Development, P.O. Box 35, Yuseong, Daejeon 34186, Republic of Korea

<sup>b</sup>Department of Electrical Engineering, KAIST, 291 Daehak-ro, Yuseong-gu, Daejeon 34141, Republic of Korea

\*Corresponding Author. E-mail address: richpine87@gmail.com, Tel: +82-42-821-2457; Fax: +82-10-823-3400

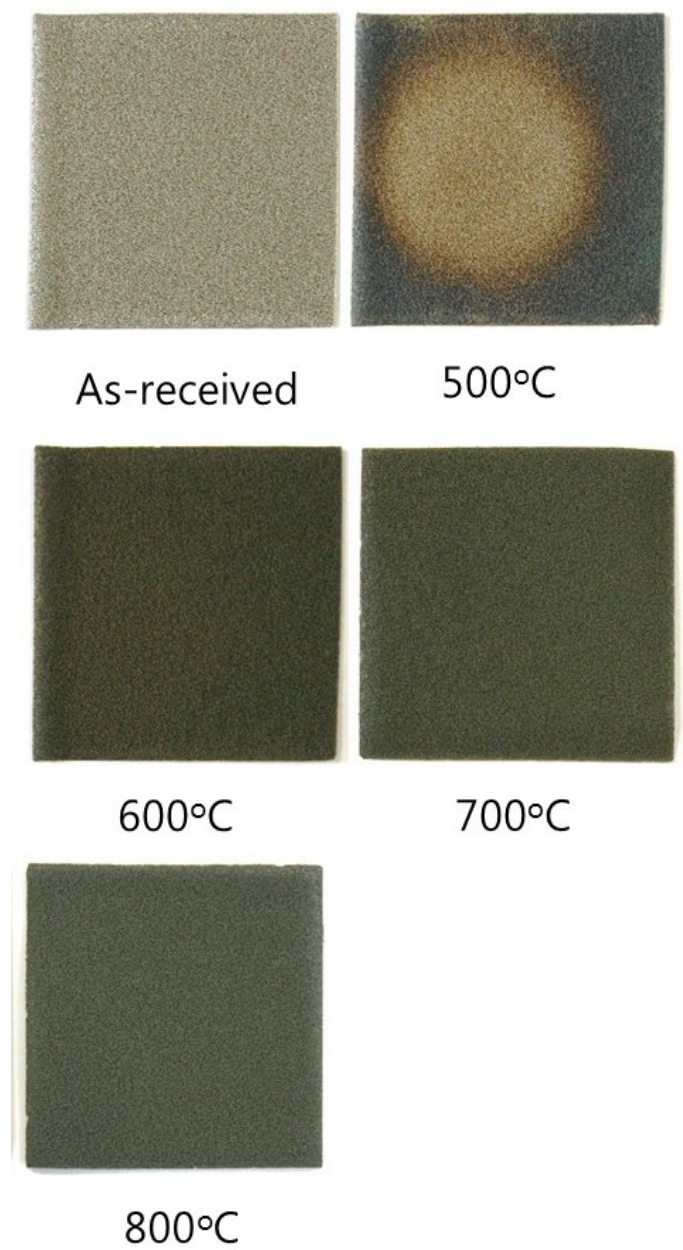

**Figure S1.** Photographs of Ni-foam oxidized at different temperatures.

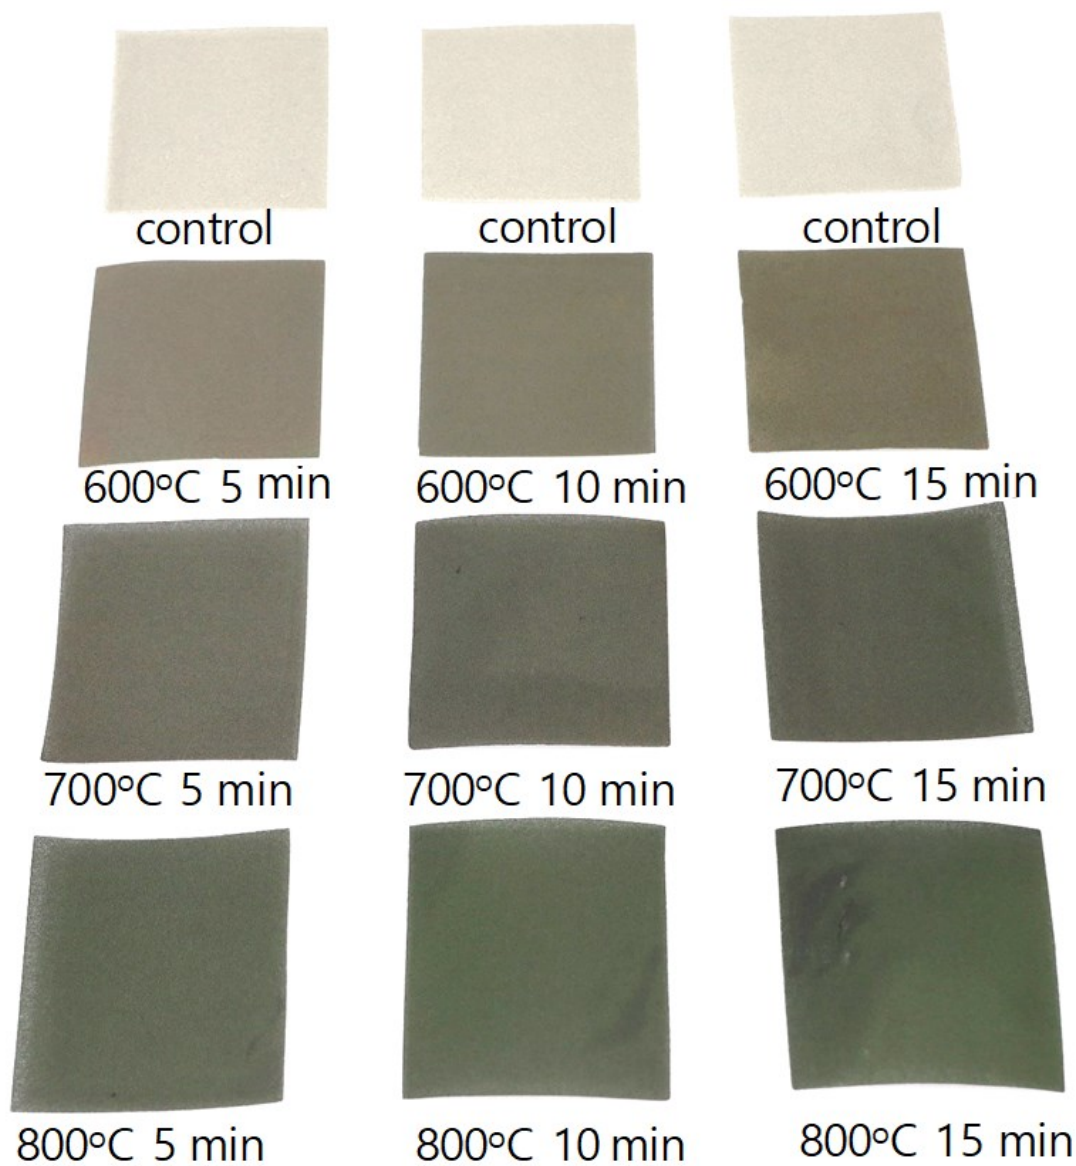

**Figure S2.** Photographs of Ni-foam oxidized at different temperatures and different durations.

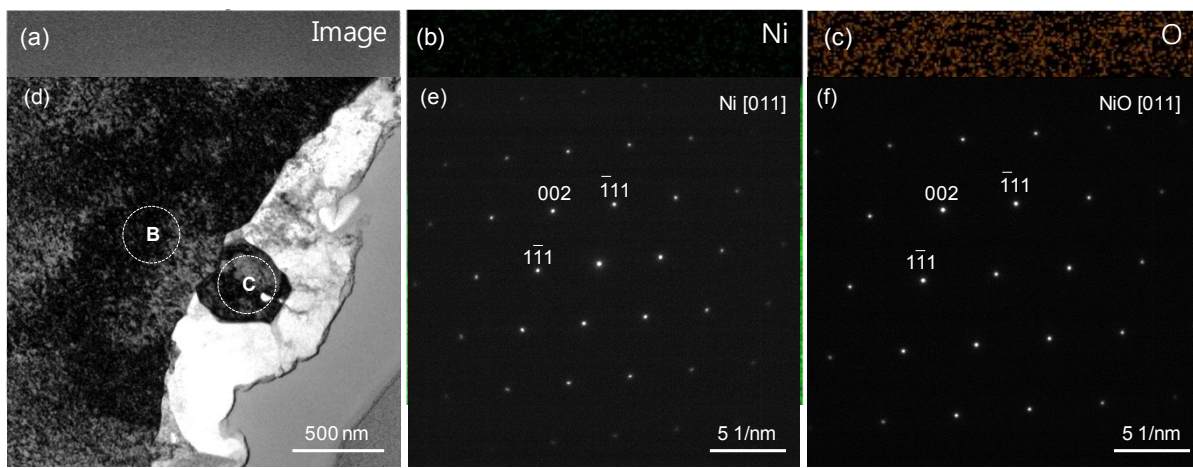

**Figure S3.** (a) TEM images of Ni-foam oxidized at 700 °C for 5 min after FIB milling. (b) Ni and (c) O EDS maps of the area shown in (a). (d) HRTEM of the interface between Ni and NiO for Ni foam oxidized at 700 °C for 5 min. SAED image of (e) Ni and (f) NiO regions indicated by the circles “B” and “C” in (d).

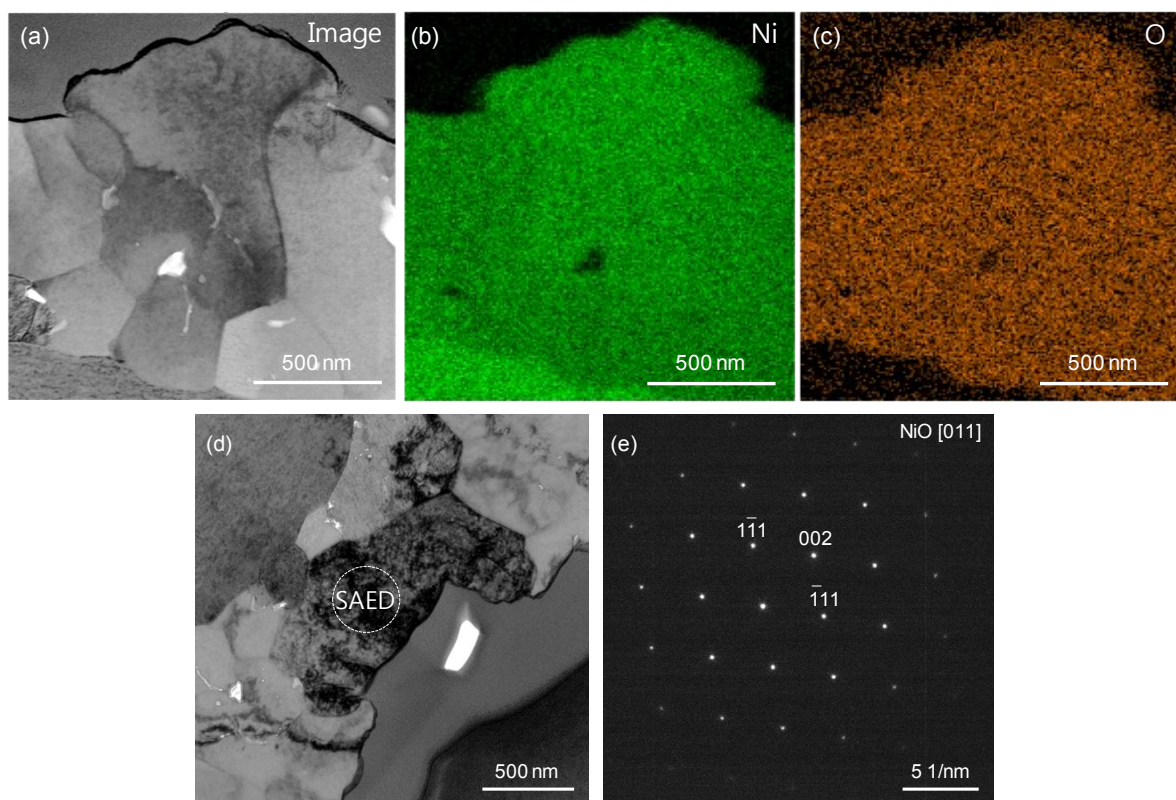

**Figure S4.** (a) TEM images of Ni-foam oxidized at 800 °C for 5 min after FIB milling. (b) Ni and (c) O EDS maps of the area shown in (a). (d) HRTEM of the interface between Ni and NiO for Ni-foam oxidized at 800 °C for 5 min. (e) SAED image of the NiO region in (d).

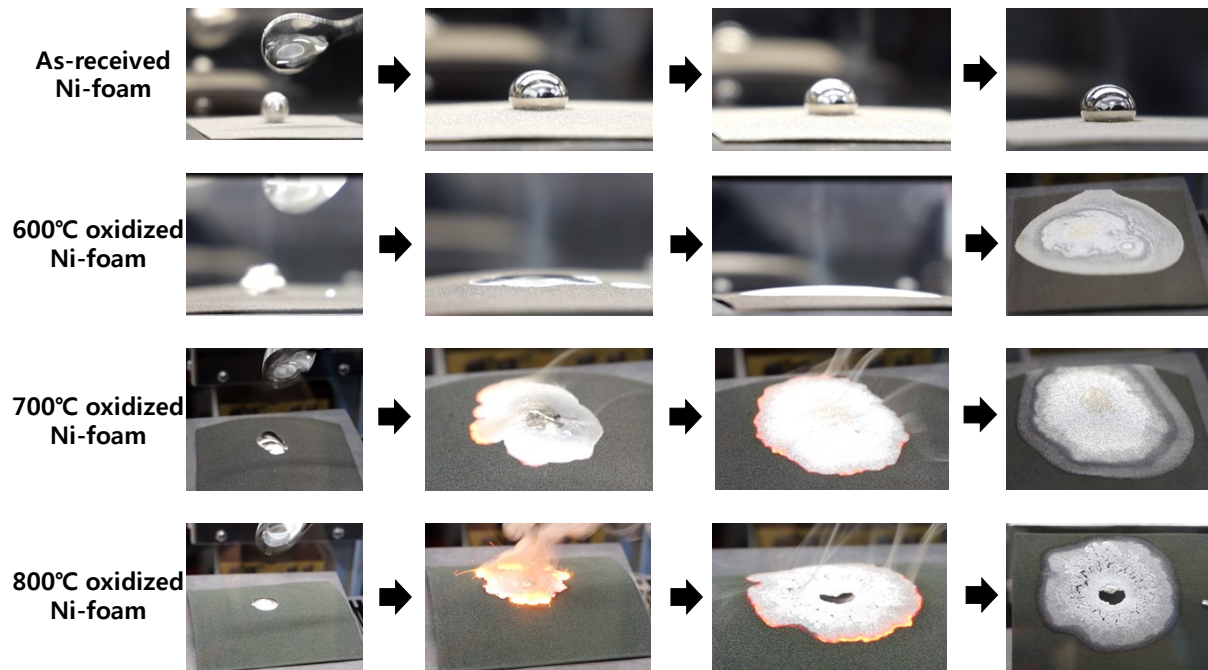

**Figure S5.** Li-infusion process for the as-received Ni-foam, and that for the Ni-foam oxidized at 600, 700, and 800 °C.

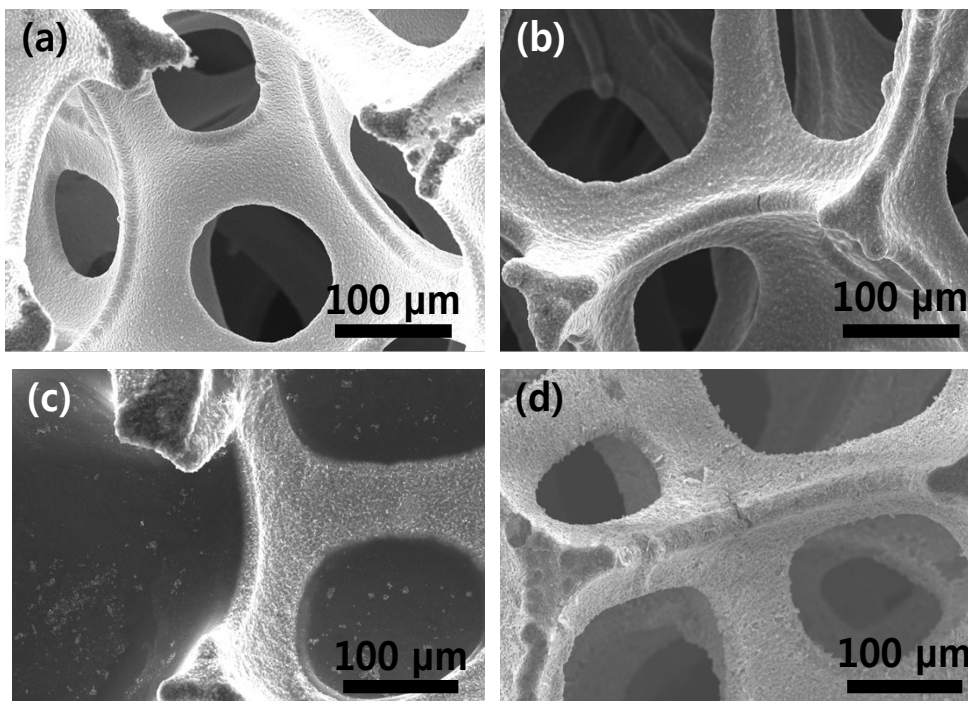

**Figure S6.** SEM images of Ni-foam oxidized at 600 °C (a) before and (b) after the surface was coated with molten Li. SEM images of (c) molten Li infused into the oxidized Ni-foam and (d) Ni-foam shown in (c) after washing in water to remove Li.

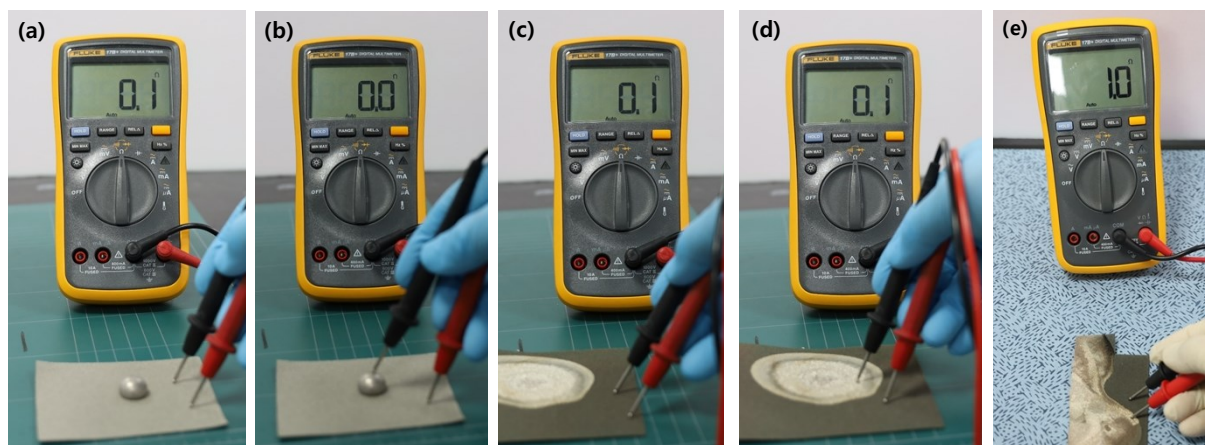

**Figure S7.** Resistivity between two points on the Ni-foam and a Li droplet and the Ni-foam for (a,b) as-received, (c,d) oxidized (600 °C, 5 min), and (e) oxidized (800 °C, 5 min) Ni-foam.

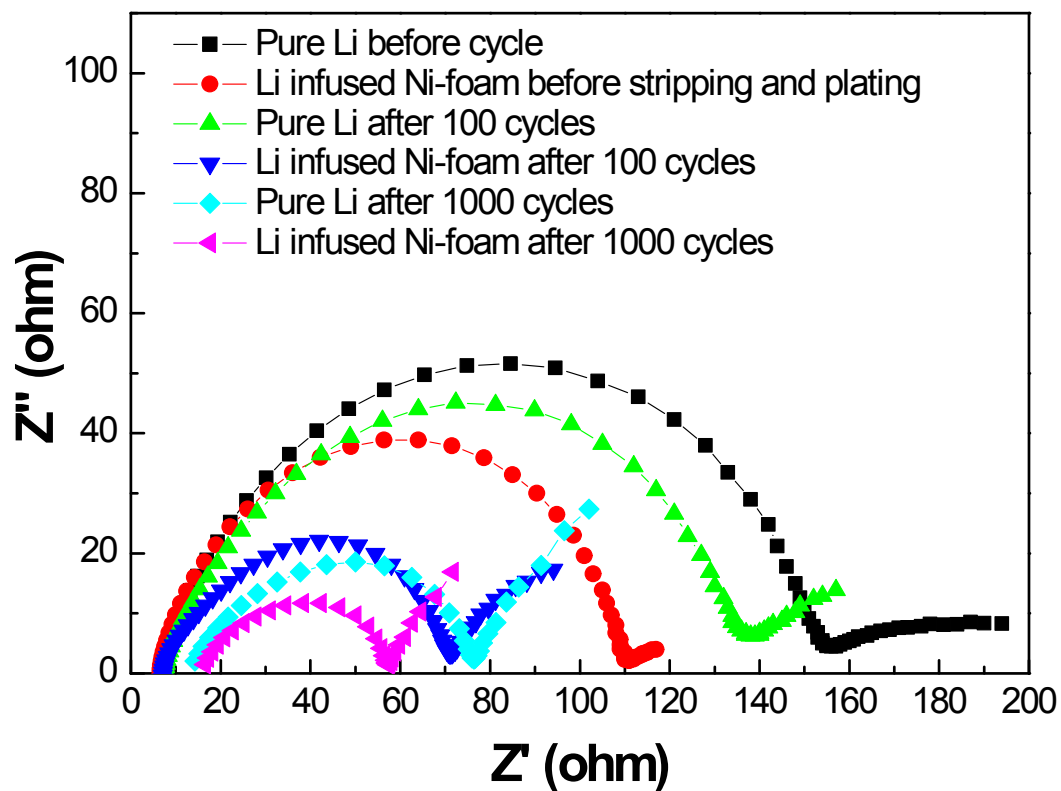

**Figure S8.** Nyquist plots of the Li-infused Ni-foam and pure Li electrodes before and after stripping and plating.

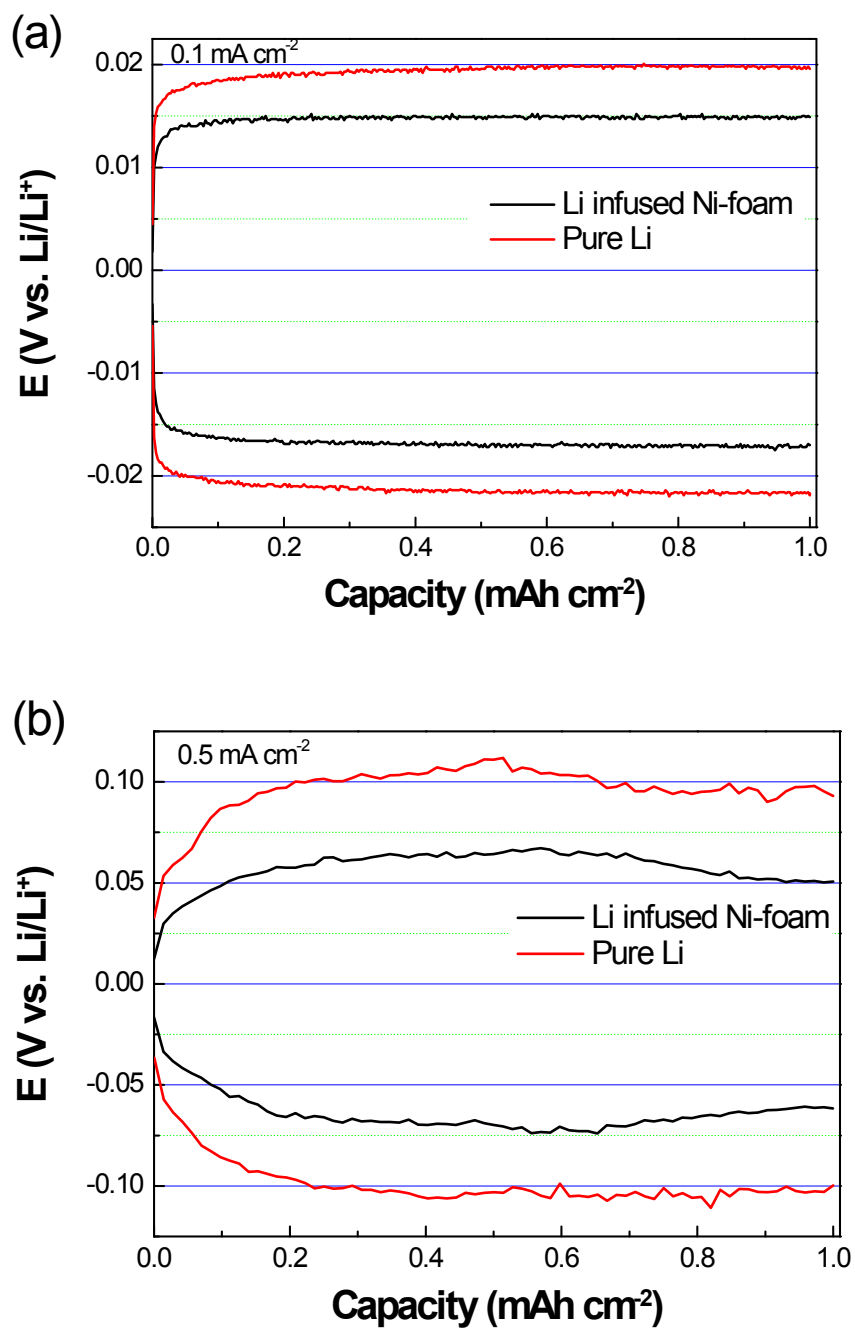

**Figure S9.** Overpotential and hysteresis of Li-infused Ni-foam and pure Li electrodes after stripping and plating at (a)  $0.1 \text{ mA cm}^{-2}$  for 100 cycles and (b)  $0.5 \text{ mA cm}^{-2}$  for 500 cycles.



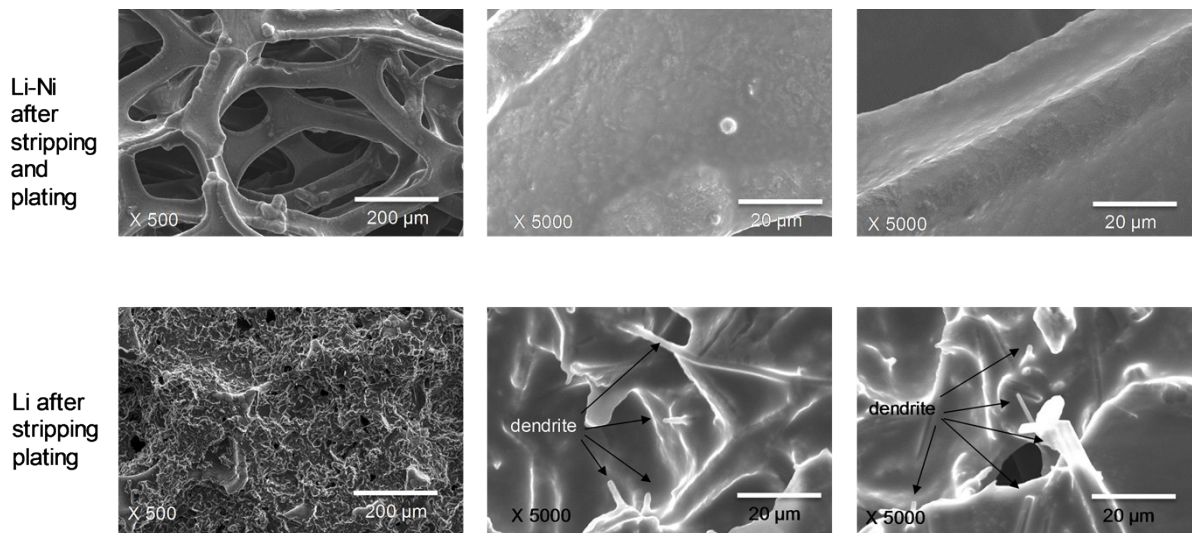

**Figure S10.** SEM images after stripping and plating of the surface for the oxidised Ni-foam and pure Li.

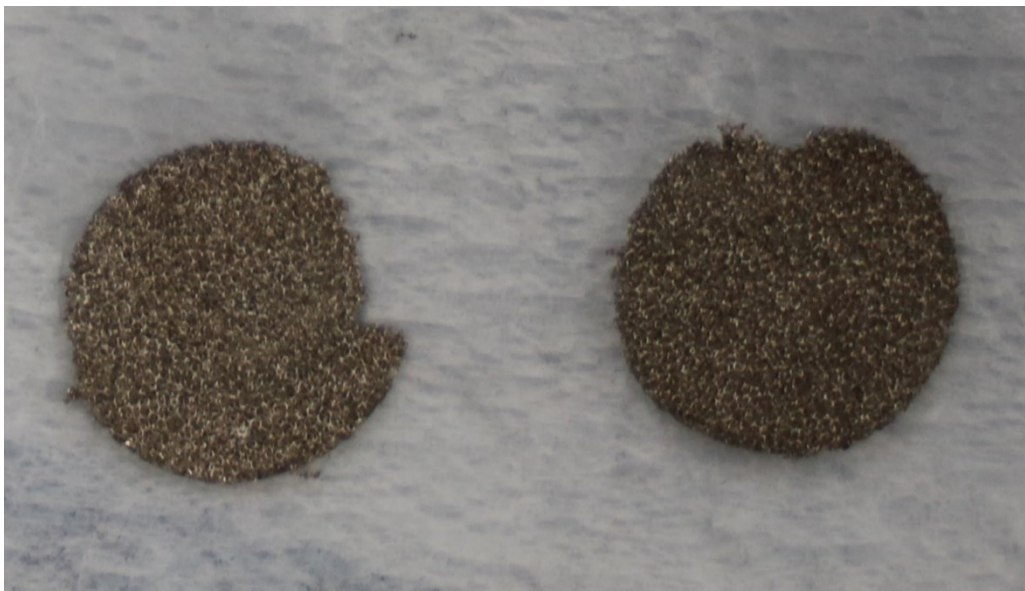

**Figure S11.** Photographs of dismantled symmetric cells which are molten Li surface coated on Ni-foam. The foam surface coated with molten Li became brittle after coin cell fabrication, which resulted in a short circuit.

## **Video Captions**

**Video Clip S1.** Molten Li wetting the oxidized Ni-foam

**Video Clip S2.** Molten Li infusing into the oxidized Ni-foam
